# Supplementary material
Source: PubMed Central journal article supplement (PMC3296556)

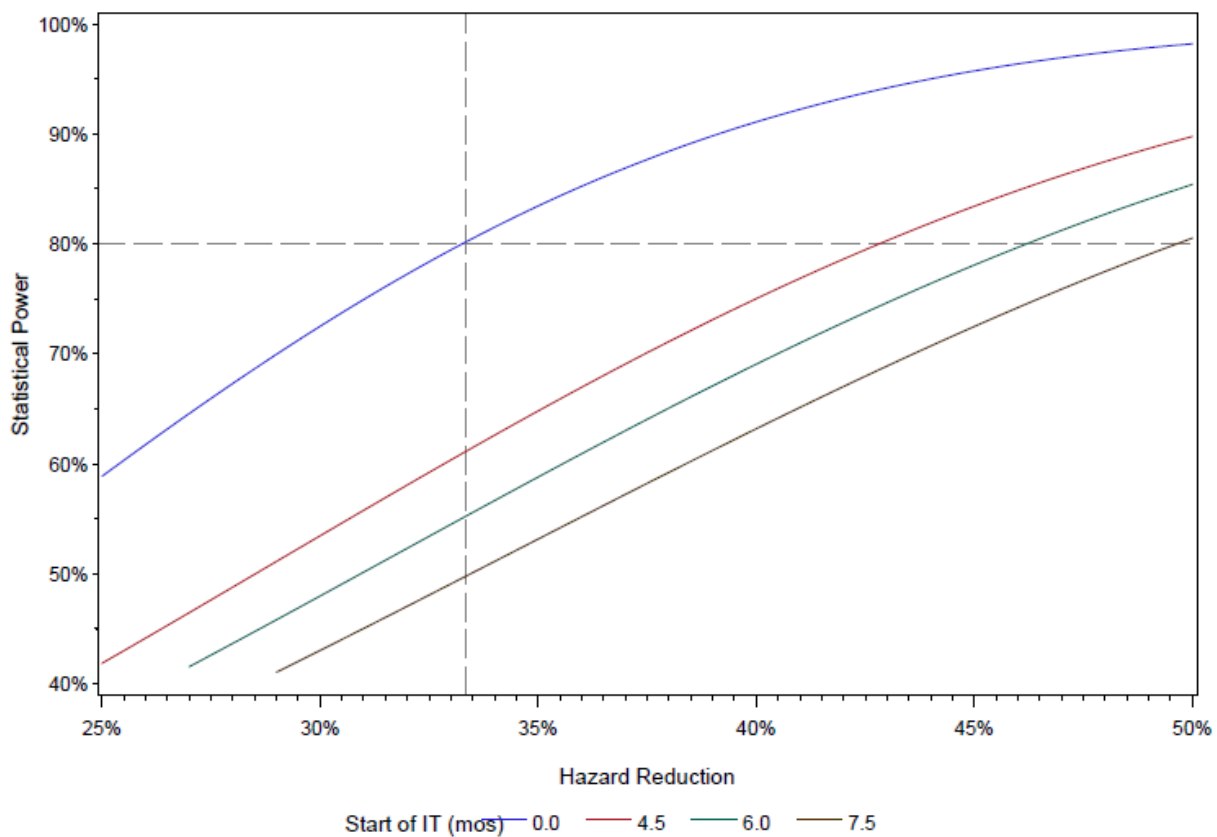

Supplement: NIHMS349748-supplement-supplement_1.pdf [file NIHMS349748-supplement-supplement_1.pdf]
